# Supplementary material for: Splicing of many human genes involves sites embedded within introns
Source: PubMed Central journal article supplement — Nucleic Acids Res. 2015 Apr 20;43(9):4721–32. doi: 10.1093/nar/gkv386 (PMC4482092; doi:10.1093/nar/gkv386), 2015-04-20
Supplement: supp_gkv386_nar-01739-a-2014-File008.pdf [file supp_gkv386_nar-01739-a-2014-File008.pdf]

## SUPPLEMENTARY DATA

### Splicing of many human genes involves sites embedded within introns

Steven Kelly<sup>1,†</sup>, Theodore Georgomanolis<sup>2,†</sup>, Anne Zirkel<sup>2,†</sup>, Sarah Diermeier<sup>3,§</sup>, Dawn O'Reilly<sup>4</sup>, Shona Murphy<sup>4</sup>, Gernot Längst<sup>3</sup>, Peter R. Cook<sup>4</sup>, and Argyris Papantonis<sup>2,\*</sup>

<sup>1</sup> Department of Plant Sciences, University of Oxford, Oxford, OX1 3RB, United Kingdom

<sup>2</sup> Centre for Molecular Medicine, University of Cologne, Cologne, D-50931, Germany

<sup>3</sup> Institut für Biochemie III, University of Regensburg, Regensburg, D-93053, Germany

<sup>4</sup> Sir William Dunn School of Pathology, University of Oxford, Oxford, OX1 3RE, United Kingdom

\* To whom correspondence should be addressed. Tel: +49-221-478-96987; Fax: +49-221-478-4833;  
Email: [argyris.papantonis@uni-koeln.de](mailto:argyris.papantonis@uni-koeln.de)

<sup>†</sup>The authors wish it to be known that these authors contributed equally to this study.

<sup>§</sup>Present Address: Cold Spring Harbor Laboratory, 1 Bungtown Road, Cold Spring Harbor, New York, 11724, U.S.A.

**Supplementary Data** include:

- **Supplementary Figures S1-S7**
- **Supplementary Table S1**

# Supplementary Figure S1

## A Tiling microarrays

*SAMD4A*  
(chr 14, 221 kbp)

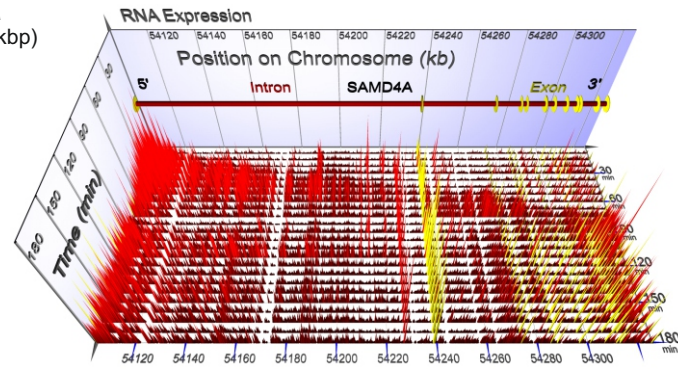

## B RNA polymerase II ChIP-qPCR

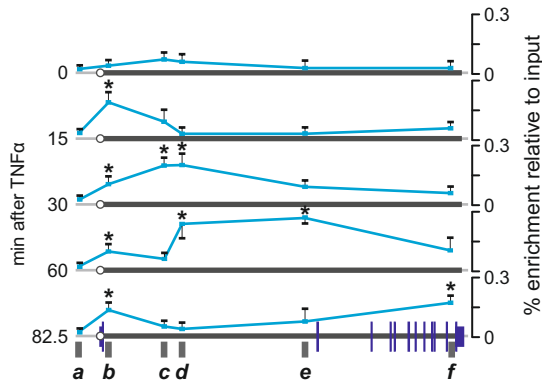

## C EU-RNA qRT-PCR

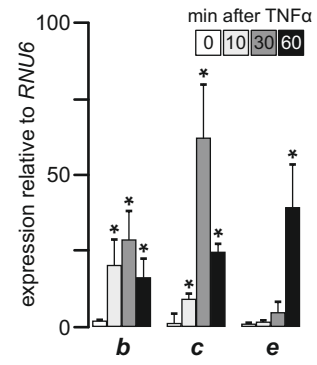

**Supplementary Figure S1. Waves of nascent transcription in *SAMD4A* intron 1.** HUVECs were treated with TNF $\alpha$  for 0-82.5 min. **(A)** A study, with 7.5-minute temporal resolution, of the “transcriptional wave” along TNF $\alpha$ -activated *SAMD4A* gene, using total RNA applied to a tiling microarray. Red signal peaks represent intronic (nascent), and yellow ones exonic normalized RNA levels (this panel is reproduced from ref. 7). **(B)** Binding of RNA polymerase II, determined by ChIP coupled to qPCR (using an antibody targeting phospho-Ser2 in the C-terminal domain of the largest subunit – and so the elongating form of the polymerase). The % enrichment ( $\pm$  SD;  $n=3$ ) for segments *a-f* of *SAMD4A* (*bottom*) at different times post-stimulation is given relative to input. Results reflect those seen in panel A and in Figure 2A. \*: significantly different from 0-min levels ( $P<0.01$ ; two-tailed unpaired Student’s *t*-test). **(C)** Nascent RNAs copied from segments *b*, *c*, and *e* in intron 1, detected by qRT-PCR. HUVECs were grown in 5-ethynyl-uridine (EU) for 5 min, biotin “clicked” on to the resulting EU-RNA, and now-biotinylated RNAs selected using streptavidin-coated magnetic beads; after DNase-treatment, specific regions of (nascent) EU-RNA ( $\pm$  SD;  $n=3$ ) were detected by qRT-PCR, and levels normalized relative to those of *RNU6* EU-RNA. Again, results reflect those seen with microarrays (panel A) and ChIP-qPCR (panel B). \*: significantly different from 0-min levels ( $P<0.01$ ; two-tailed unpaired Student’s *t*-test).

## Supplementary Figure S2

### A *SAMD4A*, RT-PCR ± SSA

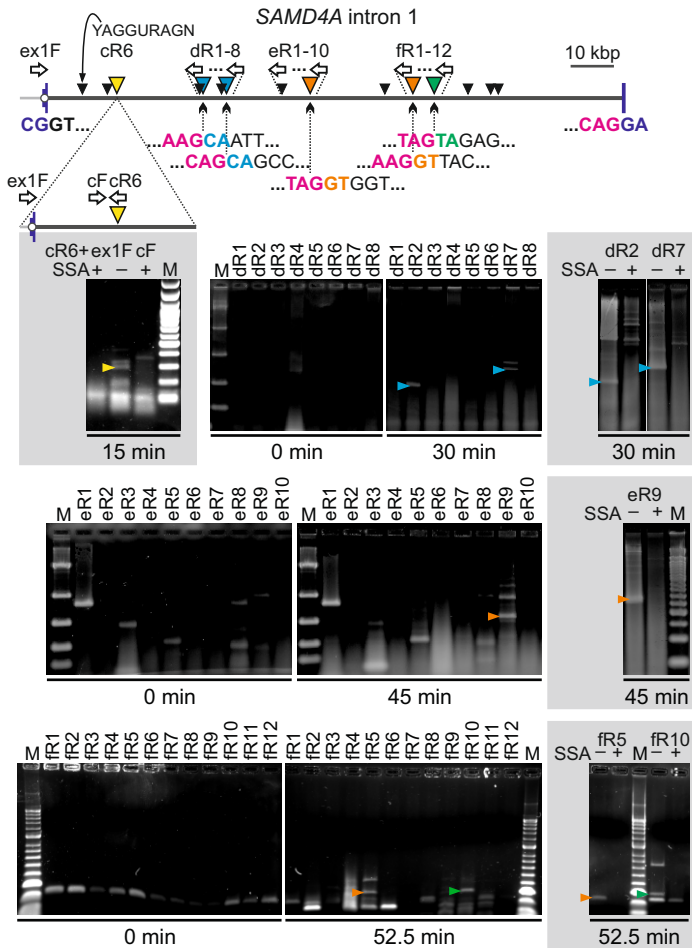

### B *SAMD4A*, RT-PCR

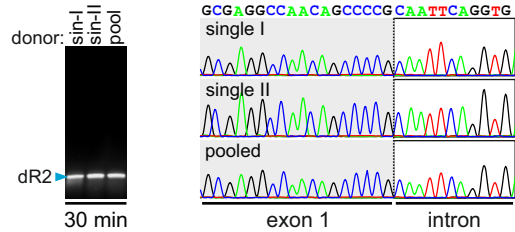

### C *EXT1*, RT-PCR ± SSA

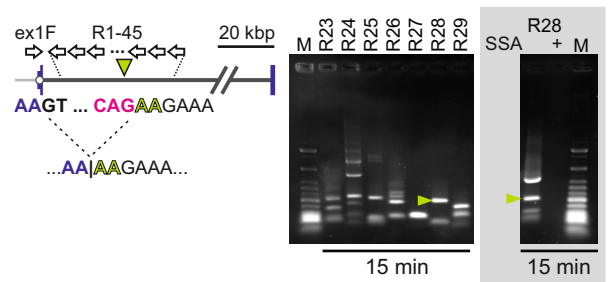

### D *SAMD4A*, verification RT-PCR ± SSA

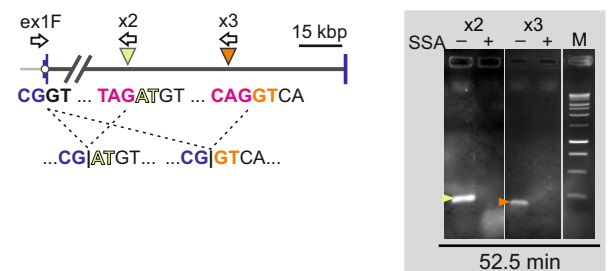

### E RS w/o serum starvation (RT-PCR)

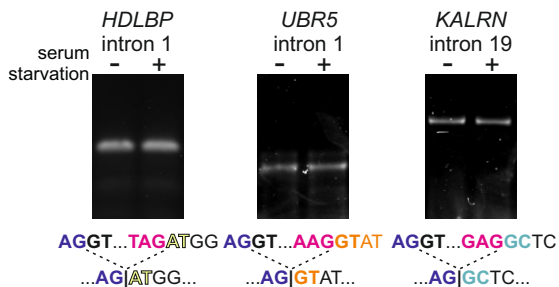

### F Effect of exosome knock-down (qRT-PCR)

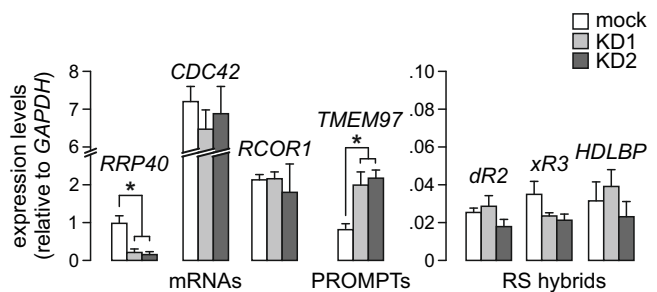

**Supplementary Figure S2. Detection of recursive splicing in long human introns.** HUVECs were treated with TNF $\alpha$  for 0-52.5 min before total RNA was isolated. **(A)** Intronic (nascent) RNA was detected by RT-PCR, amplicons resolved by electrophoresis, gels stained and imaged, and bands detected only after stimulation sequenced. The map (*top*) of intron 1 in *SAMD4A* (*blue* lines: exons 1/2) shows the primers used (*white arrows*). Forward primer “ex1F” targeting exon 1 is used successively with each reverse primer targeting indicated regions at 1-kbp intervals (“dR1-8”, “eR1-10”, and “fR1-12”). Coloured arrowheads mark RS sites, and hybrid sequences are indicated (exonic sequences – *blue*; donor GT at the 5' end of intron 1 – *black*; splice junctions – *vertical lines*; RS acceptors – *red*; bases resulting from recursive splicing that would go on to be used subsequently as donors – *blue, orange, or green*; the RS site from Figure 2A is also indicated – *yellow*). Typical gel images are shown below (M: size markers), and arrowheads (coloured as above) indicate bands with hybrid exon-intron sequences. *Grey boxes*: pre-treatment with spliceostatin A (SSA) abolishes indicated bands. **(B)** The RS hybrid resulting from RT-PCR using “exF1+dR2” was verified in total RNA preparations from HUVECs derived from two single donors (*single I and II*), and from a cell pool different from that analyzed in Figure 2 (*pooled*). Sanger sequencing chromatographs of the three amplicons (*blue arrowhead*) are shown; they all encode the expected hybrid sequence (*top*). **(C)** Mapping (as in panel A) of a spliceostatin-sensitive hybrid from a site (*light-green arrowhead*) in the 273 kbp-long intron 1 of *EXT1*. The map (*left*) shows the 5' end of the intron, and forward (exonic) primer ex1F is used successively with 45 reverse primers targeting points at ~1-kbp intervals along intron 1; images of typical gels are shown (*right*). *Grey box*: pre-treatment with spliceostatin A (SSA) abolishes the indicated band. **(D)** RNA-seq analysis uncovered seven RS sites in *SAMD4A* intron 1 (Figure 3C), 4 of which had not been seen using RT-PCR; therefore, we verified that two of these were hybrid products using RT-PCR (pairing ex1F with reverse primers x2 and x3). Images of typical gels are shown. *Yellow and orange arrowheads* mark (SSA-sensitive) amplicons encoding the expected hybrids (*left*). **(E)** Effect of serum starvation on recursive splicing. Total RNA from HUVECs in full growth medium (-), or from HUVECs serum-starved overnight (+) was isolated, DNase-treated, and used in RT-PCR to amplify the three most frequently detected hybrids in constitutively-expressed genes (according to RNA-seq data). The *HDLBP*, *UBR5*, and *KALRN* iS hybrids are detected under both growth conditions, as shown by gel electrophoresis. *Bottom*: parts of the sequences that are joined to form these exon-intron junctions are shown. **(F)** Effect of exosome inactivation on recursive splicing. A gene encoding a key subunit of the exosome, *RRP40*, was knocked down using siRNAs in

HUVECs. Total RNA was harvested from cells at the appropriate times post-stimulation, DNase-treated, and used in qRT-PCR. No significant effect was detected on the levels of two *SAMD4A* hybrids (dR2 and xR3), and one from *HDLBP*; mRNA levels of constitutively-expressed genes *CDC42* and *RCOR1* remained unaffected and serve as negative controls, while PROMPT levels from the *TMEM97* promoter rise as expected (21) and serve as a positive control. \*: significantly different ( $P < 0.01$ ; two-tailed unpaired Student's *t*-test).

# Supplementary Figure S3

## A RS consensus

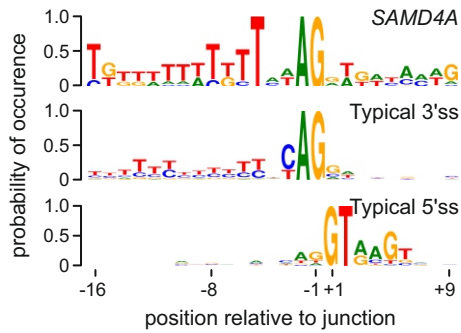

## B SAMD4A RS properties

| #      | Position (kbp from TSS) | iS site (acc donor) | Branch point (bp from junction) | pY tract (bp from BP) | 5' ss (ME score) | 3' ss (ME score) |
|--------|-------------------------|---------------------|---------------------------------|-----------------------|------------------|------------------|
| 1      | 14.2                    | AAAG ACTT           | TTAAT (-22)*                    | +4                    | -11.96           | 5.87             |
| 2      | 36.3                    | GAAG CAAT           | TTAAG (-22)                     | +2                    | -6.38            | 4.58             |
| 3      | 41.4                    | ACAG CAGC           | CTAAA (-22)*                    | +3                    | -7.48            | 5.62             |
| 4      | 60.2                    | CTAG GTGG           | GTGAC (-26)*                    | +6                    | 4.88             | 4.34             |
| 5      | 80.7                    | CTAG ATGT           | GTAAA (-21)                     | +4                    | -0.6             | 7.11             |
| 6      | 84.6                    | AAAG GTTA           | CTCAC (-25)*                    | +8                    | 6.58             | 8.59             |
| 7      | 94.5                    | TTAG TAGA           | GTAAC (-21)                     | +2                    | -6.11            | 6.98             |
| 8      | 100.9                   | GCAG GTCA           | CTGAG (-38)                     | +9                    | 9.28             | 8.17             |
| exon 1 | 0.19                    | CCCG GTAA           | -                               | -                     | 17.08            | -                |
| exon 2 | 134.1                   | TCAG GAAT           | CTTAT (-27)                     | +14                   | -                | 12.18            |

\*verified by RT-PCR (see Figure 3)

## C CHIP

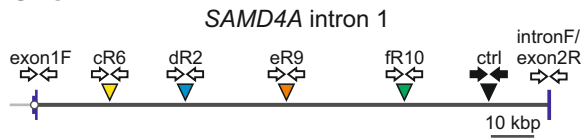

### (i) H3K36me3

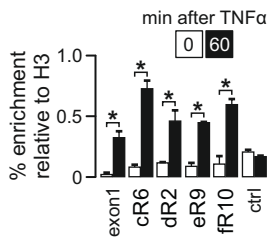

### (ii) U2AF65

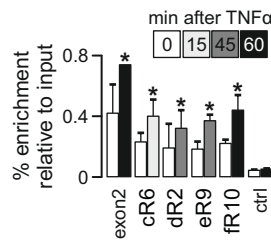

### (ii) nucleosome occupancy

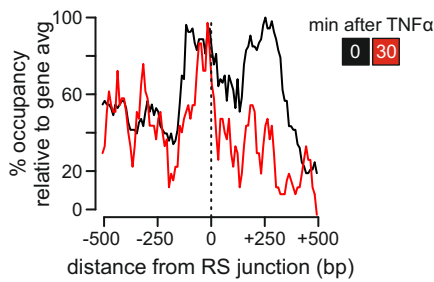

## D SAMD4A RNA-seq overview

| Feature mapped      | Events | Reads |
|---------------------|--------|-------|
| read-through        | 18     | 472   |
| <i>end-adjusted</i> | 14     | 165   |
| exon-exon junctions | 19     | 1871  |
| <i>inferred</i>     | 11     | 251   |
| recursive splicing  | 8      | 10    |
| <i>inferred</i>     | 5      | 9     |

**Supplementary Figure S3. Features of the *SAMD4A* recursive splicing sites.** (A) The consensus motif (derived using WebLogo 3; ref. 23) for eight RS sites in *SAMD4A* intron 1 resembles that of canonical acceptors, but not donors (motifs at canonical sites from **Figure 4A**). (B) Predicted splicing potential of the eight *SAMD4A* sites compared to that of the canonical donor and acceptor sites at each end of intron 1 (*bottom*). Also indicated are the position relative to the TSS (in kbp), the hybrid sequence (*vertical line* separates the 3' acceptor dinucleotide – in *red* – from the dinucleotide – in *bold black* – that could become a new donor in a subsequent RS event), the branch point (BP) identified using the yUnAy consensus (branch 'A' in *bold*), the start position (relative to the branch-point) of a poly-pyrimidine (pY) tract of 12 nucleotides, and maximum entropy (ME; ref. 31) scores (positive values in *bold*) calculated assuming each motif serves as a 5' or a 3' splice site. (C) Four RS sites in *SAMD4A* intron 1 (selected as each carries a different donor dinucleotide) carry H3K36me3 marks, and associate with U2AF65. HUVECs were treated with TNF $\alpha$  for 0-60 min, chromatin isolated, and ChIP performed using antibodies targeting (i) histone H3 carrying tri-methyl marks on lysine 36 (H3K36me3) or (ii) splicing factor U2AF65, and the primers indicated in the map (*left*). After stimulation, enrichments ( $\pm$  SD;  $n=3$ ) are normalized relative to those obtained with H3 or "input" chromatin. Profiles are similar to those given by canonical sites at exon/intron boundaries, but unlike a control region from within the intron that is not spliced ("ctrl", encodes the *Drosophila* recursive-splicing motif). \*: significantly different from 0-min levels ( $P<0.01$ ; two-tailed unpaired Student's *t*-test). (iii) Mean nucleosome occupancy  $\pm 500$  bp around the *SAMD4A* RS sites at 0 (*black line*) and 30 min (*red line*) after TNF $\alpha$  stimulation, as given by MNase-seq data (25). (D) Splicing events detected by RNA-seq in *SAMD4A*. "Read-through" refers to reads mapping across exon/intron boundaries; "end-adjusted" refers to read-through after removing reads mapping to the first and last *SAMD4A* exons (these skew results as the background of pre-existing mRNAs yield 5'- and 3'-UTR reads); "exon-exon junctions" refers to conventional splicing junctions seen in RefSeq genes; "inferred" refers to read pairs in which one maps solely to within an exon and the other to another exon (so neither read runs across the potential exon-exon junction); "recursive splicing" refers to hybrids 1-8 shown on the left, and "inferred" again to reads supporting these which flank, but do not contain, the actual junction sequence.



# Supplementary Figure S4

## A Novel exons

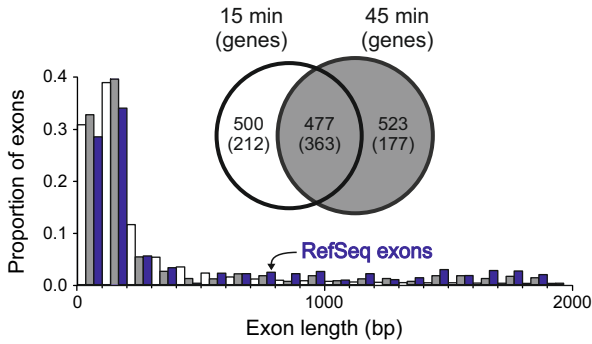

## B Correlation to epigenetic features

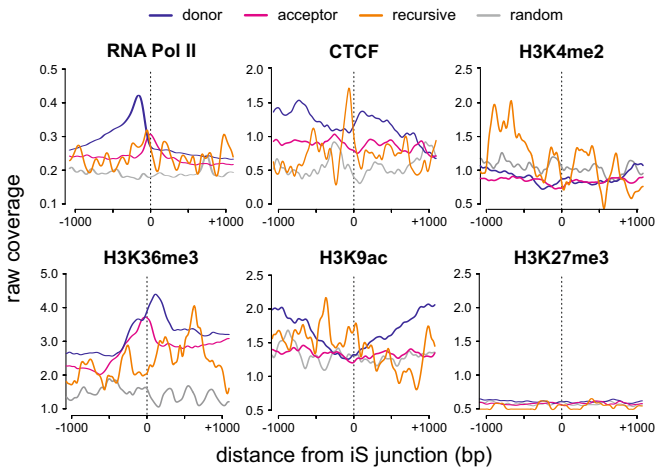

## C Correlation to HMM chromatin features

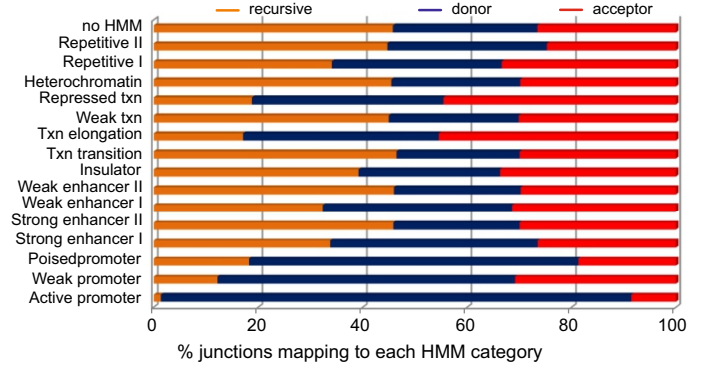

## D Epigenetic features (per donor dinucleotide)

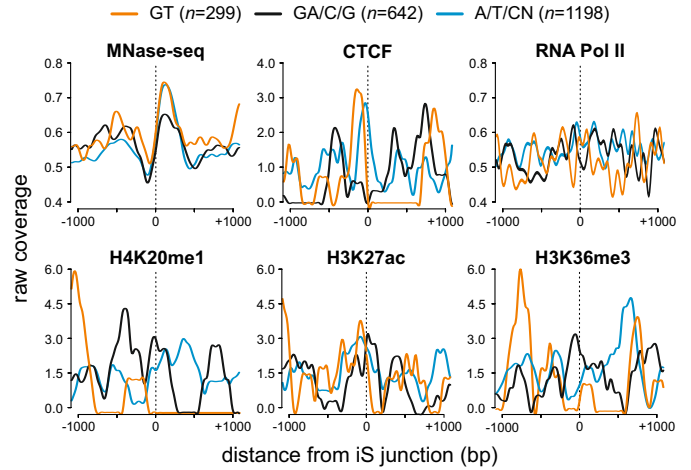

**Supplementary Figure S4. Novel exons and chromatin modifications associated with recursive splicing sites.** (A) Novel exons. An exon was categorized as “novel” if (i) it is not found in any *Ensembl* gene model, and (ii) hybrid sequences linking its 5' and/or 3' ends to a known exon are also seen in our poly(A)<sup>+</sup>-selected RNA-seq libraries. The Venn diagram shows the number of unique versus shared novel exons seen in the 15- (*black*) and 45-min (*grey*) libraries. The plot shows the size distributions of novel and RefSeq exons (*blue*). (B) Some epigenetic features of RS sites (*orange*) compared to canonical donors (*blue*) and acceptors (*red*); randomly-selected (but actively-transcribed) regions from the same introns provide controls (*grey dotted lines*). Data sources: ChIP-seq for histone marks and CTCF (ENCODE data, unstimulated HUVECs), and RNA polymerase II (HUVECs, 30 min post-TNF $\alpha$ ). A “silent” mark, H3K27me3 – not enriched at any of our sites – provides another control. (C) Correlation of RS, donor, and acceptor sites (color-coded as above) to Hidden Markov Models (HMM) of chromatin features derived using an integrative annotation of ChIP-seq data on chromatin modifications generated by the ENCODE consortium on HUVECs (26). (D) Epigenetic features around RS sites categorized according to dinucleotides at positions +1/+2 (GT: *orange line*, GA/C/G: *black line*, or A/T/CN *blue line*). Data sources: as above. All three dinucleotides tend to be associated with a nucleosome positioned immediately 3' of the site, but GT and A/T/CN groups are more similar to one another and distinct from GN ones (except for H4K20me1).

## Supplementary Figure S5

### A RS detection and correlation to gene features (top 100 events/library)

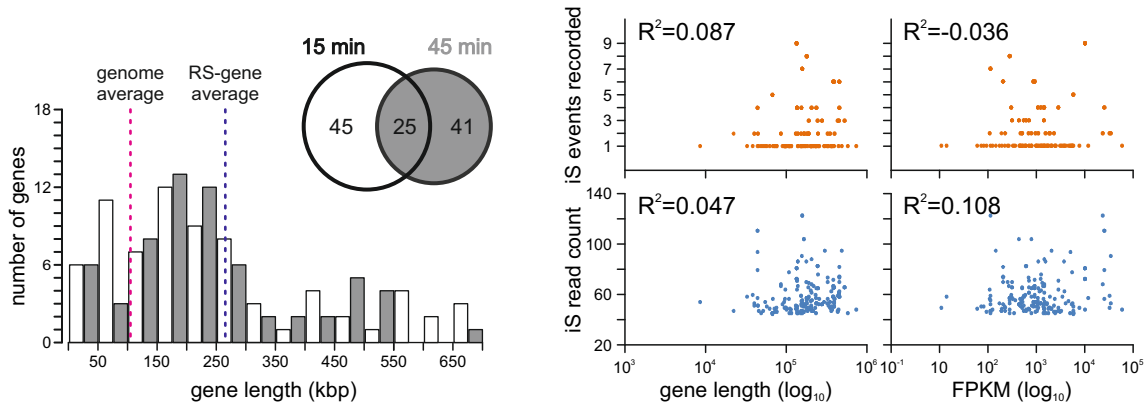

### B GO term enrichment analysis (top 100 events/library)

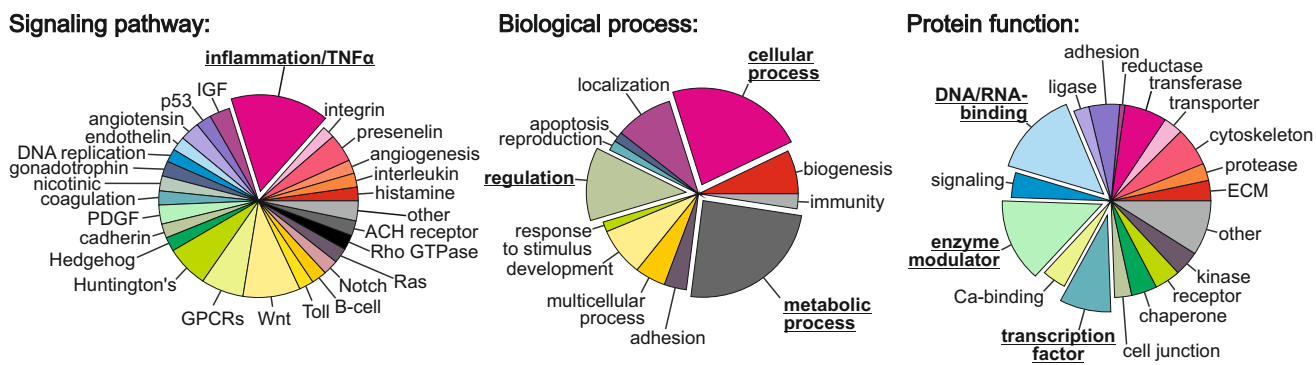

### C Conservation at RS sites (genome browser view)

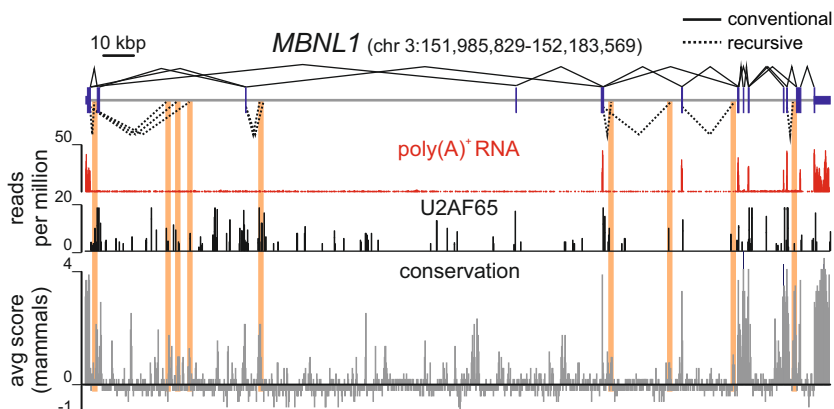

**Supplementary Figure S5. Features and conservation of recursive splicing sites (from RNA-seq data).** (A) Features of the top 100 most-frequently observed RS events. The Venn diagram shows the number of genes that host the top 100 RS events in the 15- (*white*) and 45-min (*grey*) library, respectively; 25 are shared. The histogram shows the distribution of genes in each library according to gene length (same colour code). Genes with hybrids (average ~244 kbp) are longer than the average gene (~63 kbp). The plots (*right*) show that neither the number of different iS hybrids seen per gene, nor their total number of read counts (Fragments Per Kilobase of transcript per Million mapped reads; FPKM), correlate well with increasing gene length ( $R^2 < 0.2$ ; Pearson's correlation coefficient). (B) Gene Ontology (GO) terms for the genes hosting the top 100 RS events recorded by RNA-seq. The analysis was performed using PANTHER (<http://www.pantherdb.org/>) on a list of 111 genes (from panel A). Results for "signalling pathways", "biological process", and "protein function" are displayed as pie charts, and overrepresented categories are indicated (*bold, underlined*; must include >10% of dataset). (C) Conservation at recursive splicing (RS) sites. The gene model of *MBNL1* depicts conventional (*solid lines*) and recursive splicing (*dotted lines*) alongside tracks for poly(A)<sup>+</sup>-selected RNA (60 min after TNF $\alpha$ ; *red*), U2AF65 binding (HeLa, from ref. 27; *black*), and sequence conservation between placental mammals (from the UCSC browser; *grey*). Segments involved in RS (unfiltered; *highlighted orange*) tend to have intermediate levels of conservation (between those of intron and exons).

# Supplementary Figure S6

Alignments of clone sequences (chromatographs)

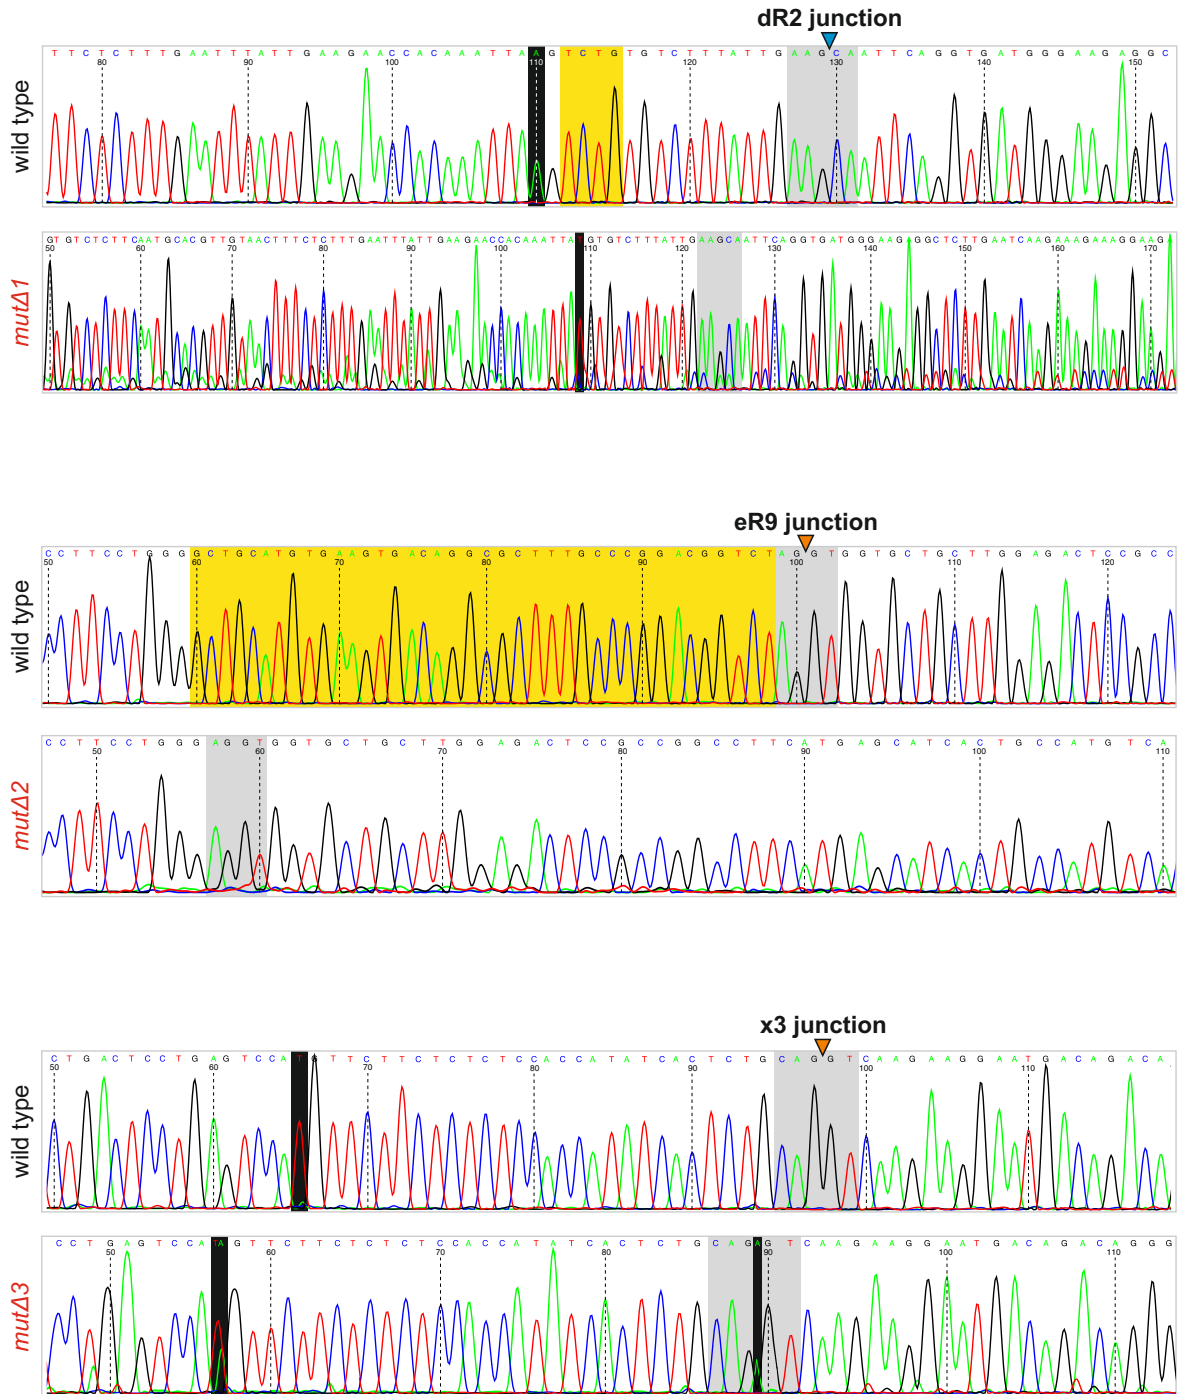

**Supplementary Figure S6. Identification of clone mutations in RS sites after CRISPR-Cas9n manipulations.** The chromatographs resulting from Sanger sequencing of the three mutated HEK293A clones, *mutΔ1-3*, compared to the wild type clone, wt, which was transfected with vectors carrying no sgRNA sequences. In all three cases, RS junctions are denoted by an arrowhead and RS-acceptors/-donors highlighted grey, stretches wild-type sequences deleted in the mutants are highlighted yellow, and nucleotide positions changed or inserted (as in the x3 junction) highlighted black.

# Supplementary Figure S7

## A Alignment of *RNU1* variants

| gene          | 5' end sequence alignment                   | location (hg19)  |
|---------------|---------------------------------------------|------------------|
| <i>vU1.19</i> | -----ATACTTACC---TGGCAGGGGAGATACTATTATC-AA  | chr1:149,514,090 |
| <i>vU1.20</i> | ATACTTATGTTAACC---TGGCAGAAGAAATGTTATGATC--- | chr1:149,605,911 |
| <i>xU1.52</i> | -----ATACTTACC---TGGCAGTGGAGATACCATGATC---  | chr6:13,214,288  |
| <i>xU1.53</i> | -----ACAAGCAC---CTGGCATAGGAGATACCACAATC---  | chr18:48,810,103 |
| <i>vU1.11</i> | -----ATATTTACT---TGGCAGGGGAGATAACATGATC---  | chr1:147860642   |
| <i>xU1.03</i> | -----ATGCTTACC---TGGCAGGGGAGATACCATGATC---  | chrX:118,557,705 |
| <i>RNU1-1</i> | -----ATACTTACC---TGGCAGGGGAGATACCATGATC---  | chr1: ,840,617   |
| <i>xU1.55</i> | -----ATATGTACC---TGGCAGGGGAGATACCATGATC---  | chr7:119,645,990 |
| <i>xU1.48</i> | -----ATACTTA-C---TGGCAGGGGAGATACCATGATC---  | chr8:23,934,510  |
| <i>xU1.50</i> | -----ATAATGCTTTGTGGCGGGGAGAGACGCTGTGGTC     | chr17:56,736,507 |

\*
\*\*\*\*
\*\* \*
\*

↓ donor recognition  
 dinucleotide

## B Expression of *RNU1* variants in HUVECs

### (i) ENCODE RNA-seq

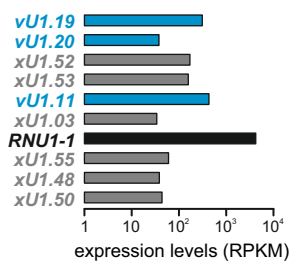

### (ii) qRT-PCR

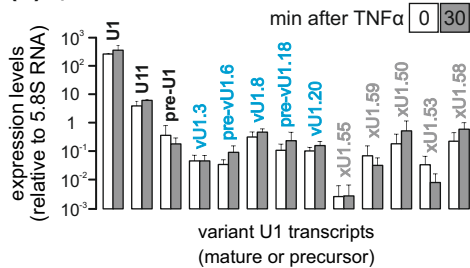

**Supplementary Figure S7. Identification of robustly expressed *RNU1* variants in HUVECs.**

(A) Alignment of some *RNU1* variants that might be involved in successive RS events. The sequence of the *RNU1-1* gene on chromosome 1 (*black bold*) was used as a probe in a BLAT search against the human genome (<http://genome.ucsc.edu/cgi-bin/hgBlat>); a set of >60 similar sequences (xU1.01-58; *not shown*) were returned – most were unannotated. Nine are presented here (with 5' ends aligned, conserved bases marked by *grey shading* and stars). Their sequences are similar to that of *RNU1-1* and carry “donor recognition” dinucleotides (*orange highlight*) that could pair with non-canonical (without a GT) or atypical (with a GT, but without other typical bases encompassing it) splicing donors. (B) Expression of *RNU1* variants in HUVECs stimulated with TNF $\alpha$  for 0 or 30 min. (i) A plot showing the expression levels of the nine most highly expressed *RNU1* variants (previously unidentified – *grey*; from ref. 39 – *blue*) alongside the typical *U1* transcript (*black*). Data, presented in “reads per million”, from ENCODE data (<http://genome.ucsc.edu/cgi-bin/hgTrackUi?db=hg19&q=wgEncodeCshlLongRnaSeq>). (ii) A plot showing expression levels of mature or precursor (“pre-”) transcripts for variant U1 genes that produce unique amplicons in qRT-PCR. 0- (*white*) and 30-min (*grey*) levels are expressed relative to those of 5.8S RNA ( $\pm$ SD;  $n=3$ ); colour-coding as in panel B.i.



**Supplementary Table S1. A full catalogue of recursive splicing sites in HUVECs (after filtering).** A .BED file containing the 2,389 unique recursive splicing sites identified in HUVECs at 15 and 45 min post-stimulation. The base indicated (by chromosomal and strand location; genome reference build: hg19) corresponds to the +2 position after the RS junction.
